# Supplementary material for: Capturing by self-assembled block copolymer thin films: transfer printing of metal nanostructures on textured surfaces
Source: Royal Society of Chemistry journal article supplement (doi:10.1039/c3cc46198j), 2013-10-30
Supplement: c3cc46198j.pdf [file c3cc46198j.pdf]

# Capturing by self-assembled block copolymer thin films: transfer printing of metal nanostructures on textured surfaces

Hidenori Mizuno,\* Isao Sakata, and Koji Matsubara

Research Center for Photovoltaic Technologies, National Institute of Advanced Industrial Science and Technology  
Central 2, 1-1-1 Umezono, Tsukuba, Ibaraki 305-8568 Japan  
E-mail: h-mizuno@aist.go.jp

## 1. Experimental Procedures

**General.** The nanoimprinted plastic film used as a stamp mold was purchased from Scivax Corp. (product ID: FLH-230/500). Two kinds of poly(dimethylsiloxane) (PDMS), termed hard- and soft-PDMS, were used in this study. The prepolymers of hard-PDMS (VDT-731, HMS-301, and SIP6831.1) were purchased from Gelest Corp., and those of soft-PDMS (Sylgard 184) were purchased from Dow Corning. 2,4,6,8-tetramethyl-2,4,6,8-tetravinylcyclotetrasiloxane was purchased from Sigma-Aldrich. Polystyrene-*block*-poly-2-vinylpyridine (PS-*b*-P2VP) with molecular weights of 133 and 132 kg/mol (for PS and P2VP, respectively, PDI = 1.15) was purchased from Polymer Source, Inc. The textured F-doped SnO<sub>2</sub> (SnO<sub>2</sub>:F) film on glass was purchased from Asahi Glass Company.

**Stamp Fabrication.** The surface of the nanoimprinted plastic film was spin-coated with hard-PDMS [a mixture of VDT-731 (0.38 g), SIP6831.1 (2 μL), 2,4,6,8-tetramethyltetra-vinylcyclotetrasiloxane (12 μL), and HMS-301 (0.12 mL)] at 1000 rpm for 40 s, and then cured at 65 °C for 30 min. Subsequently, soft-PDMS (a 10:1 mixture of Sylgard 184 polymer kit) was poured onto the hard-PDMS-coated nanoimprinted film, degassed, and cured again at 80 °C at least for 3 h. After the second curing, the whole sample was allowed to cool to room temperature, and then the composite PDMS was carefully separated from the plastic film and used as a stamp.

**Transfer Printing.** A metal (Au, Ag, or Cu) film was deposited on the composite PDMS stamp using an electron beam evaporation apparatus at the rate of ~1 nm/s. A cleaned Si wafer or SnO<sub>2</sub>:F/glass substrate was spin-coated with a 0.3 mg/mL o-xylene solution of PS-*b*-P2VP at 5000 rpm for 40 s. The metal-coated PDMS stamp was manually placed on the PS-*b*-P2VP coated substrate whose surface was wet with ethanol. The whole samples was transferred into a desiccator and dried under a reduced pressure (~10 torr) to remove the ethanol from the metal/polymer interface. After 5-10 min, the sample was taken out from the desiccator, and the PDMS stamp was released from the substrate.

**Characterization.** Atomic force microscopy was taken with SII Nanotechnology Nanonavi II (tapping mode) using Si cantilevers under ambient conditions. Scanning electron microscopy (SEM) was performed with Hitachi S-4300 using an electron energy of 10k eV. UV-visible spectroscopy was taken with PerkinElmer Lambda 950.

## 2. Supporting Figures

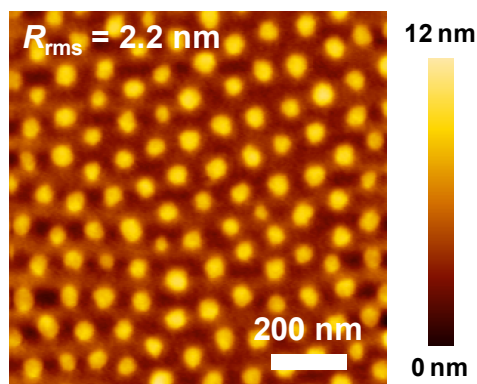

**Figure S1.** The AFM image of a self-assembled PS-*b*-P2VP thin film on a flat Si surface. A pseudo-hexagonal arrangement of P2VP domains surrounded by a continuous PS network was observed. The  $R_{\text{rms}}$  here was 2.2 nm.

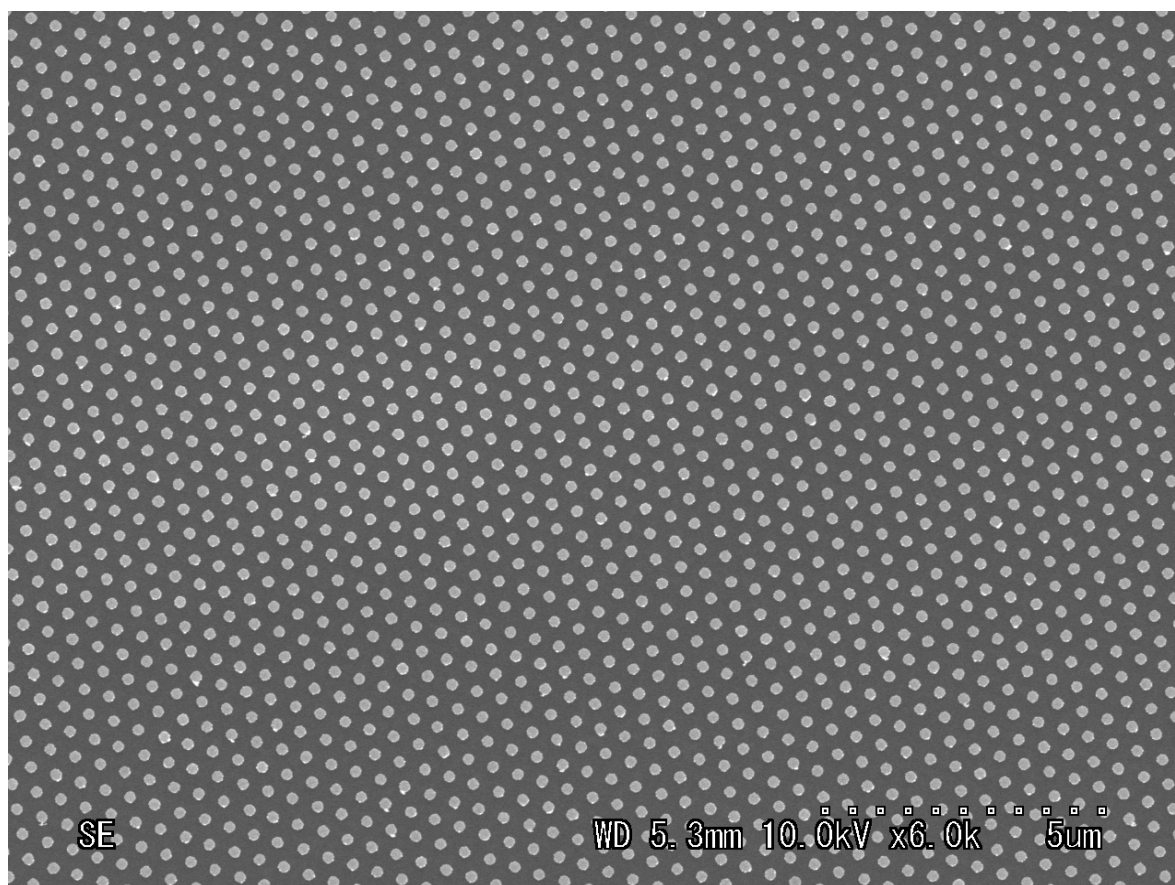

**Figure S2.** The SEM image of transfer-printed Ag nanodisks on a flat Si surface, with a lower magnification compared to Figure 2b in the main text.

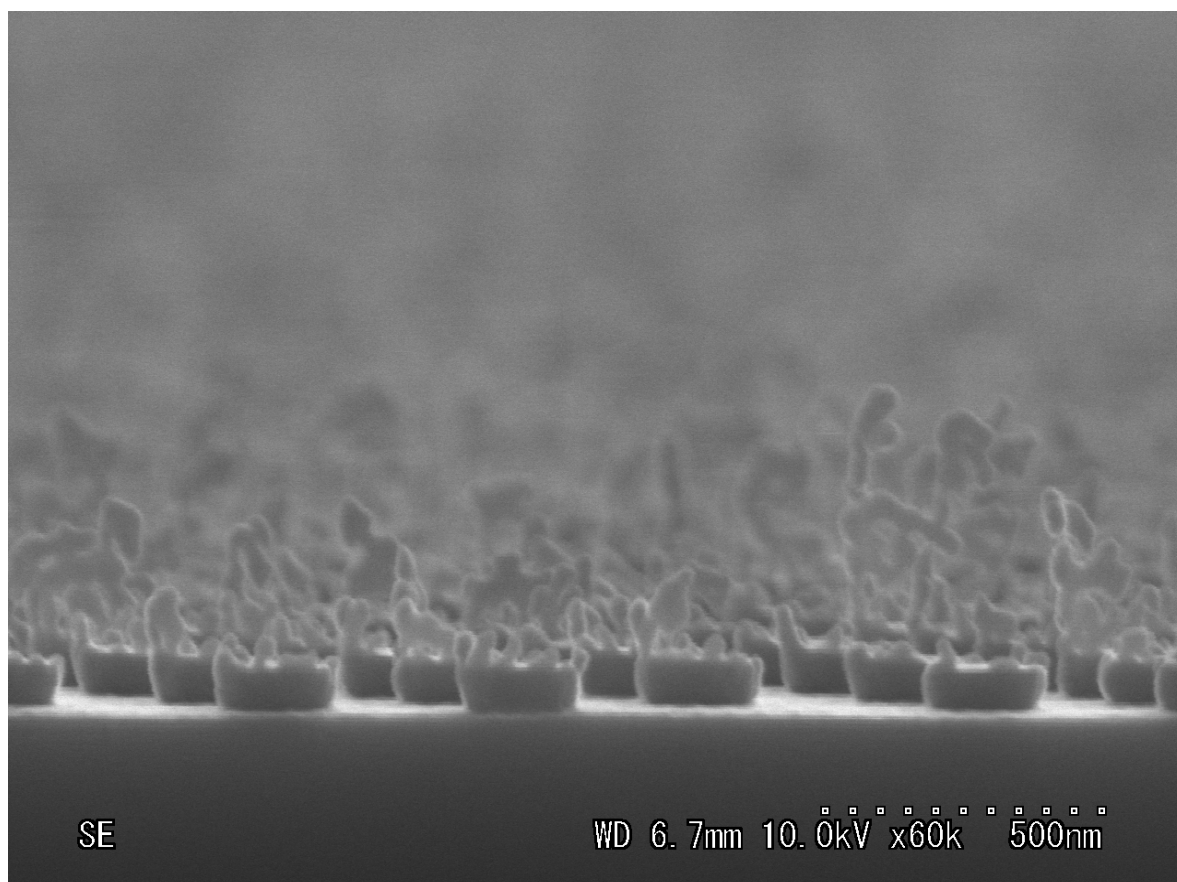

**Figure S3.** The cross-sectional SEM image of transfer-printed Ag nanodisks on a flat Si surface. The thickness of the Ag was 100 nm when evaporated on the PDMS stamp. Burr formations along the disk edges were clearly observed (an extreme case).



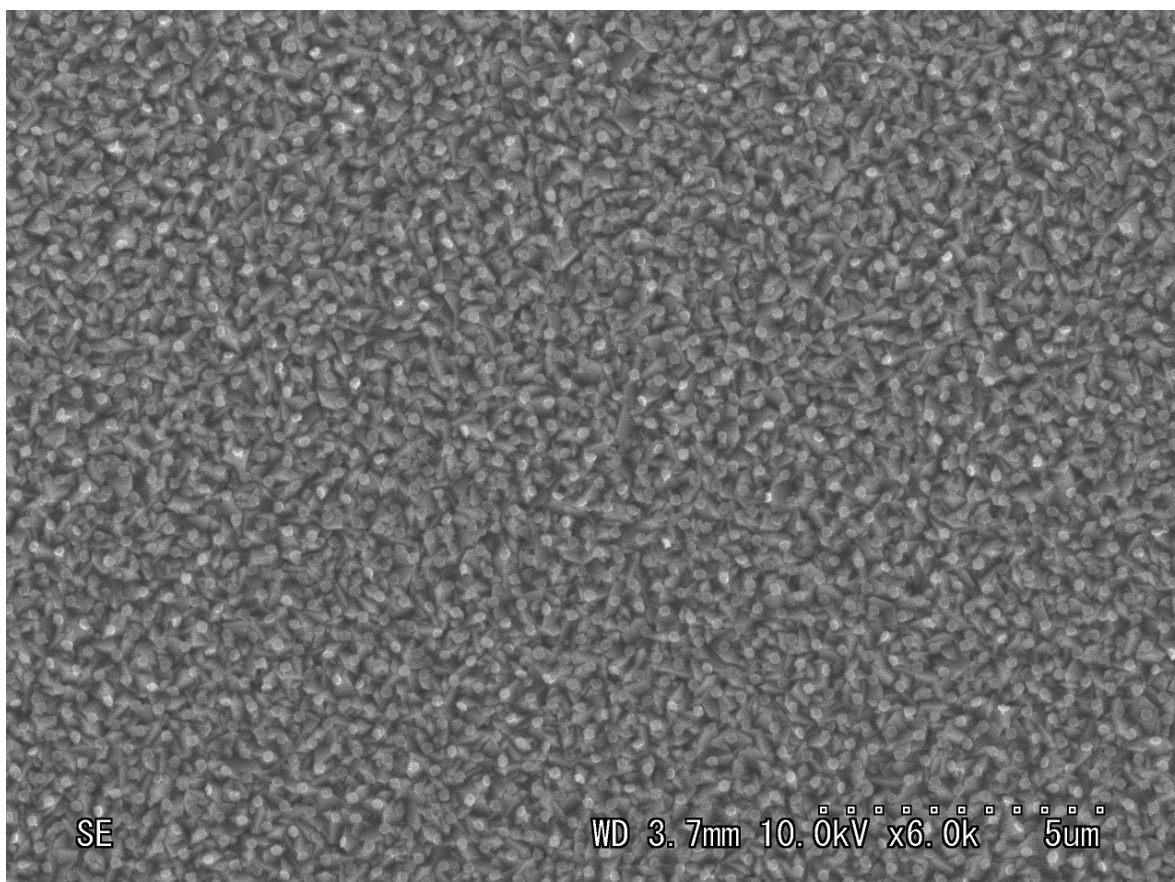

**Figure S4.** The SEM image of transfer-printed Ag nanodisks on a textured SnO<sub>2</sub>:F surface, with a lower magnification compared to Figure 3b in the main text.

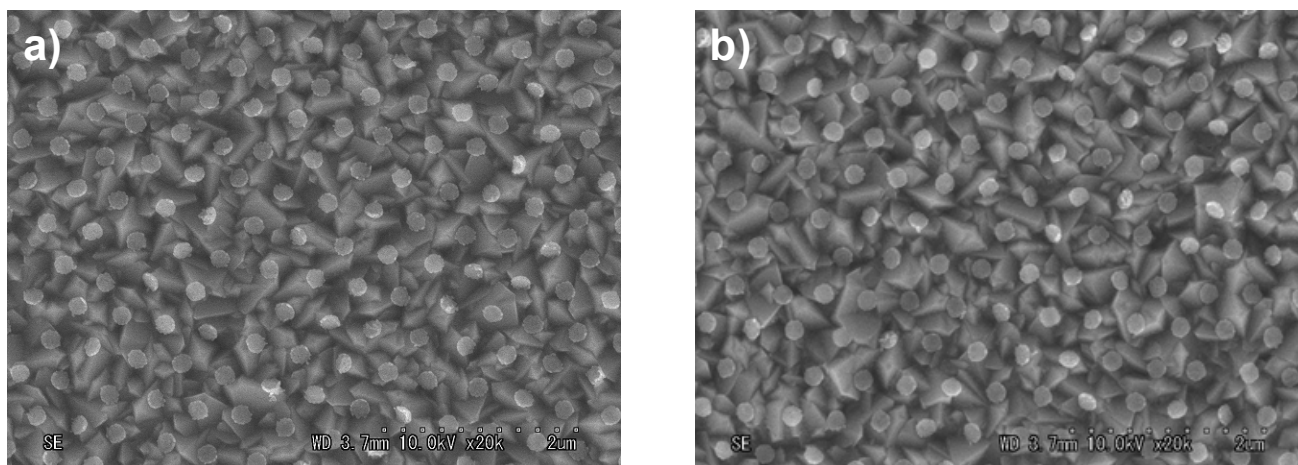

**Figure S5.** The SEM images of transfer-printed Ag nanodisks on textured SnO<sub>2</sub>:F surfaces. (a) Before and (b) after the ultrasonication treatment in H<sub>2</sub>O for 15 min. No significant difference was observed.

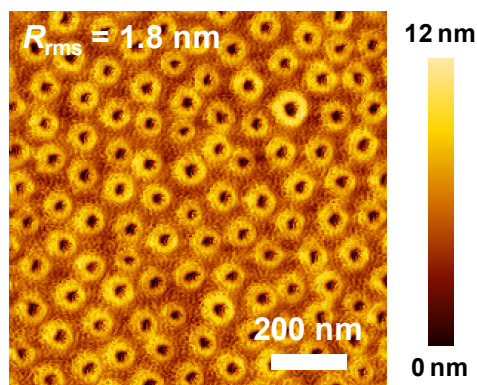

**Figure S6.** The AFM image of a self-assembled PS-*b*-P2VP thin film on a flat Si surface, reconstructed by an ethanol treatment. The  $R_{\text{rms}}$  here was 1.8 nm.

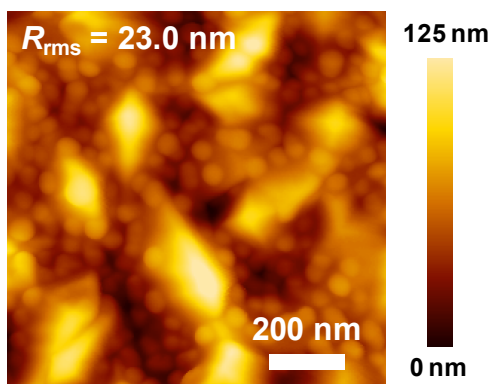

**Figure S7.** The AFM image of a self-assembled PS-*b*-P2VP thin film on a textured SnO<sub>2</sub>:F surface. The  $R_{rms}$  here was 23.0 nm.

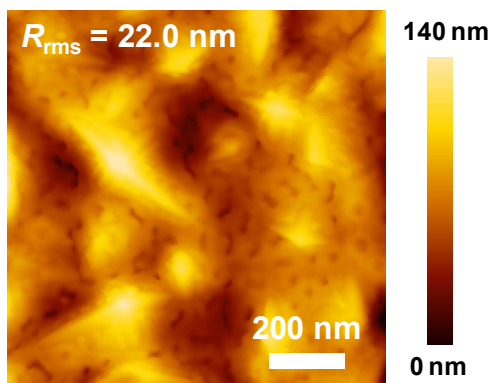

**Figure S8.** The AFM image of a self-assembled PS-*b*-P2VP thin film on a textured SnO<sub>2</sub>:F surface, reconstructed by an ethanol treatment. The  $R_{rms}$  here was 22.0 nm.
